# Supplementary material for: Identification and Analysis of Three Hub Prognostic Genes Related to Osteosarcoma Metastasis
Source: Hindawi journal article supplement (doi:10.1155/2021/6646459), 2021-01-30

PDE1B, Nelarabine

Cor=0.867,  $p<0.001$

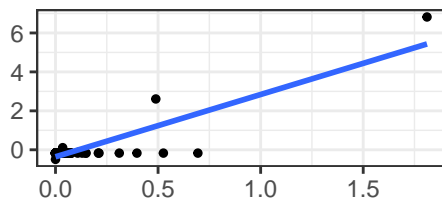

PDE1B, Fluphenazine

Cor=0.773,  $p<0.001$

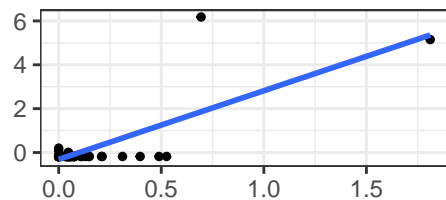

PDE1B, Chelerythrine

Cor=0.586,  $p<0.001$

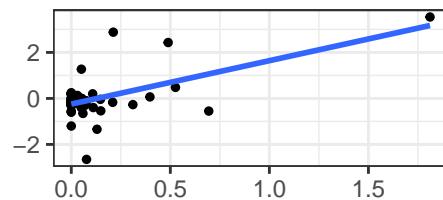

PDE1B, Dexamethasone Decadron

Cor=0.584,  $p<0.001$

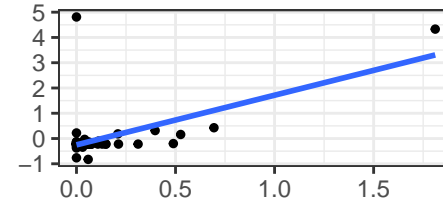

PDE1B, PX-316

Cor=0.534,  $p<0.001$

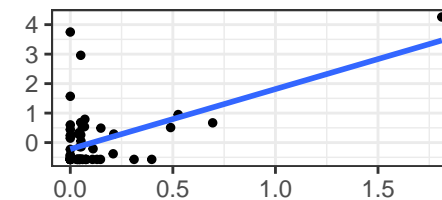

PDE1B, Hydroxyurea

Cor=0.530,  $p<0.001$

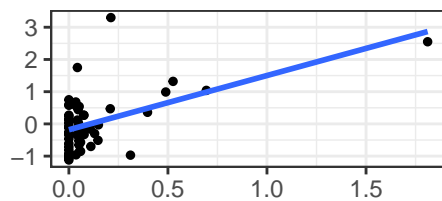

PDE1B, Cyclophosphamide

Cor=0.496,  $p<0.001$

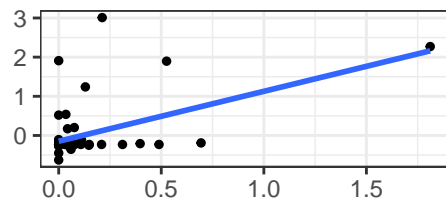

PDE1B, Asparaginase

Cor=0.487,  $p<0.001$

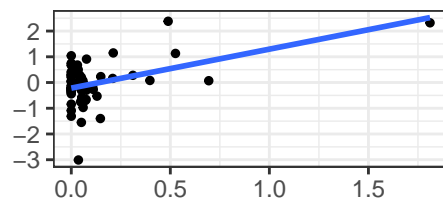

PDE1B, Arsenic trioxide

Cor=0.476,  $p<0.001$

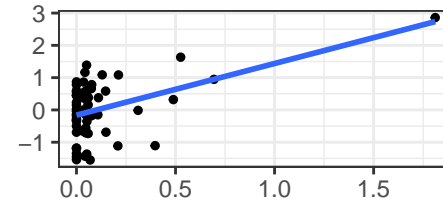

PDE1B, Ifosfamide

Cor=0.475,  $p<0.001$

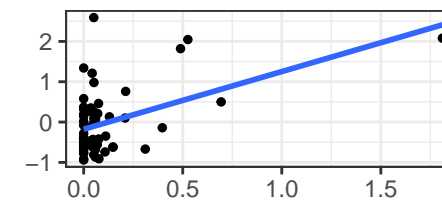

PDE1B, Chlorambucil

Cor=0.466,  $p<0.001$

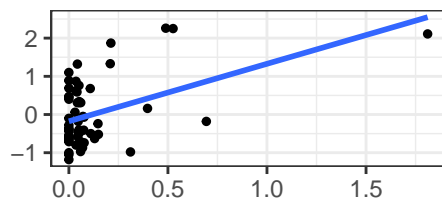

PDE1B, Fenretinide

Cor=0.462,  $p<0.001$

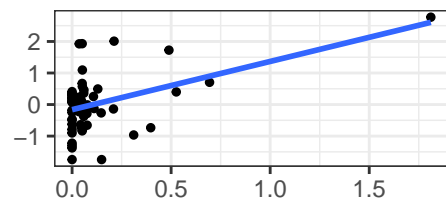

PDE1B, Carmustine

Cor=0.462,  $p<0.001$

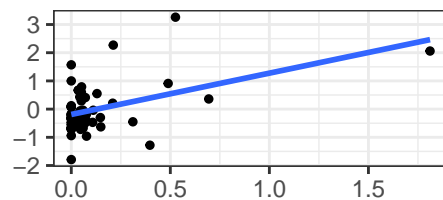

PDE1B, Pipobroman

Cor=0.457,  $p<0.001$

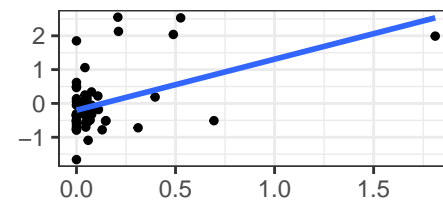

PDE1B, XK-469

Cor=0.454,  $p<0.001$

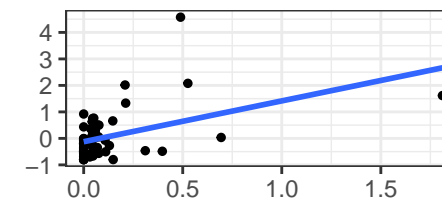

PDE1B, Imexon

Cor=0.447,  $p<0.001$

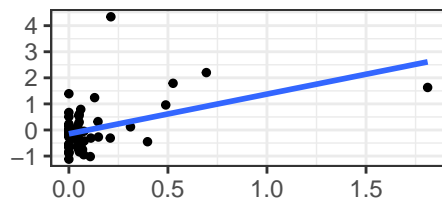

PDE1B, Dimethylaminoparthenolide

Cor=0.446,  $p<0.001$

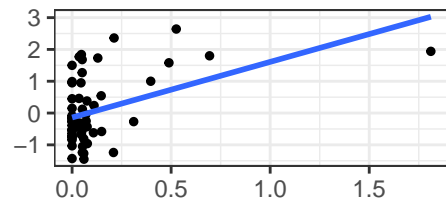

PDE1B, Irofulven

Cor=-0.444,  $p<0.001$

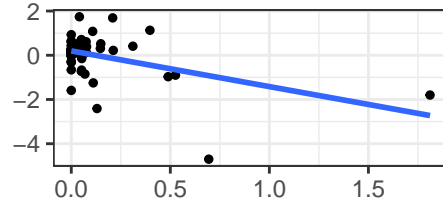

PDE1B, Etoposide

Cor=0.435,  $p<0.001$

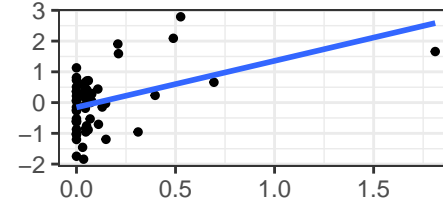

PDE1B, Melphalan

Cor=0.430,  $p<0.001$

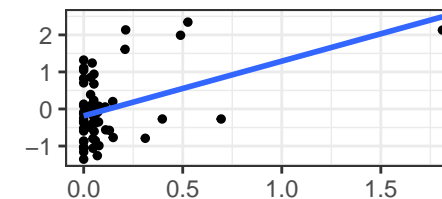

PDE1B, 7-Hydroxystauros

Cor=0.420,  $p<0.001$

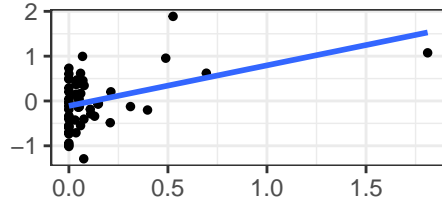

PDE1B, Oxaliplatin

Cor=0.413,  $p=0.001$

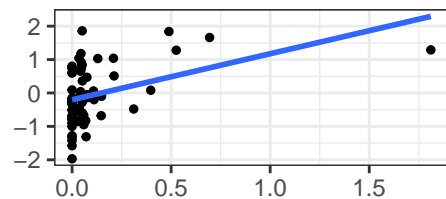

PDE1B, Uracil mustard

Cor=0.410,  $p=0.001$

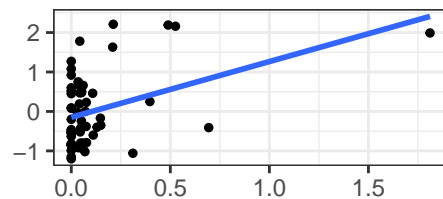

PDE1B, Fludarabine

Cor=0.409,  $p=0.001$

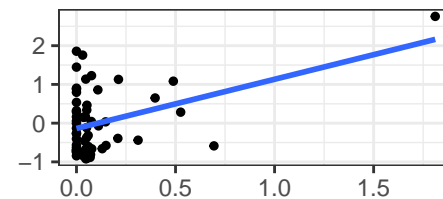

LOXL4, Docetaxel

Cor=-0.406,  $p=0.001$

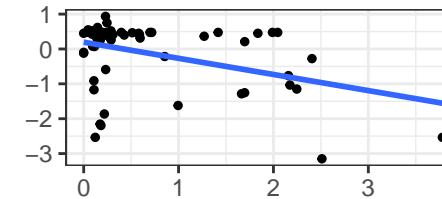

Supplement: f1 [file 6646459.f1.pdf]
